# Supplementary material for: Combined Ultrahigh Pressure Extraction and High-Speed Counter-Current Chromatography for Separation and Purification of Three Glycoside Compounds from Dendrobium officinale Protocorm
Source: MDPI journal article supplement (doi:10.3390/molecules26133934), 2021-06-28
Supplement: s1 [file s1]

# Combined Ultrahigh Pressure Extraction and High-Speed Counter-Current Chromatography for Separation and Purification Three Glycoside Compounds from *Dendrobium officinale* Protocorm

Wei Zhang <sup>1,2</sup>, Yingjie Zhang <sup>2</sup>, Jinying Wang <sup>1,2</sup>, Wenjuan Duan <sup>1,2</sup> and Feng Liu <sup>1,2,\*</sup>

<sup>1</sup> School of Pharmaceutical Sciences, Qilu University of Technology (Shandong Academy of Sciences), Jinan, 250014, China; zhangwei01101212@163.com (W.Z.); jewel\_wong@foxmail.com (J.W.); duanwj4048@126.com (W.D.)

<sup>2</sup> Shandong Analysis and Test Center, Key Laboratory for Applied Technology of Sophisticated Analytical Instruments of Shandong Province, Qilu University of Technology (Shandong Academy of Sciences), Jinan, 250014, China; trudysunny@163.com

\* Correspondence: liufeng8109@qlu.edu.cn or liufeng8109@163.com ; Tel.: +86-0531-82605319

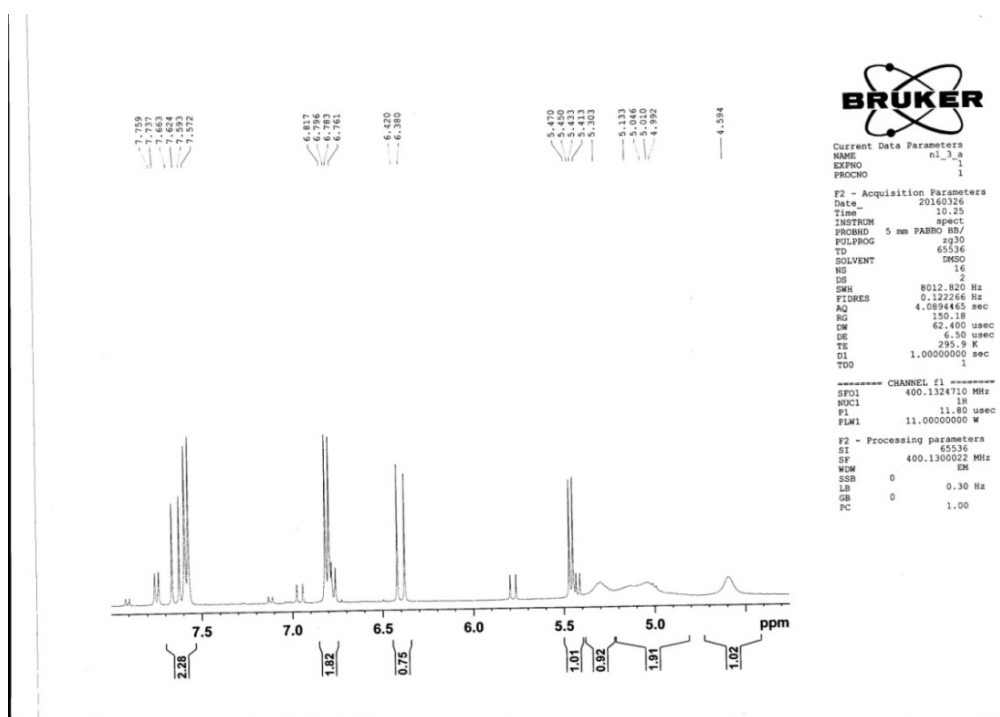

Figure S1. <sup>1</sup>H NMR of compound I (β-D-glucopyranose1-[(E)-3-(4-hydroxyphenyl)-2-propenoat]) .

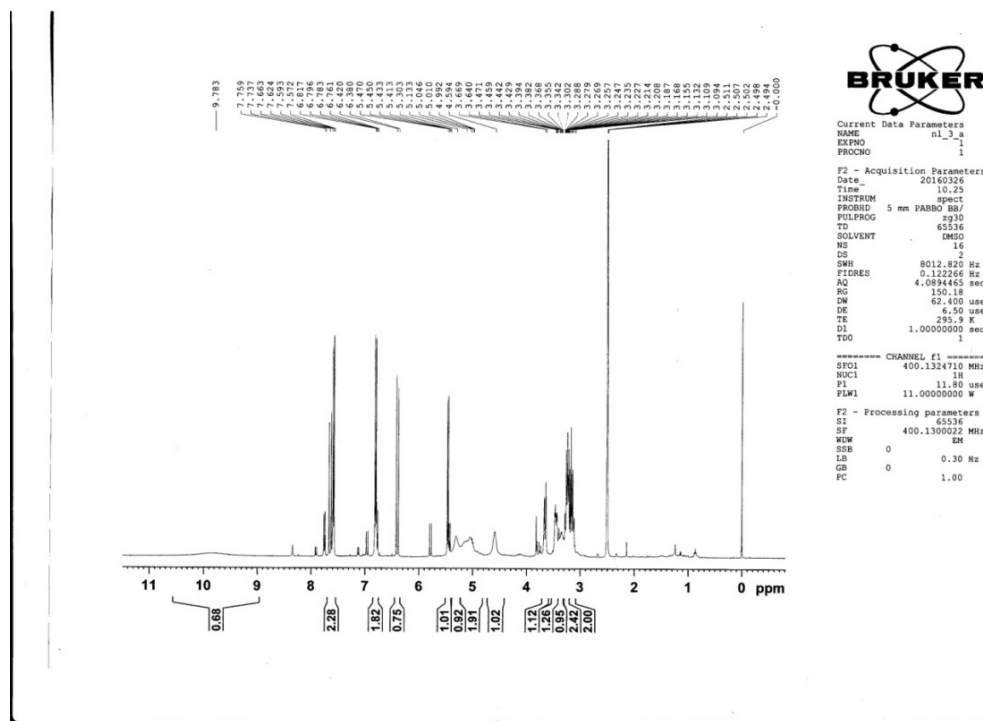

Figure S2.  $^1\text{H}$  NMR of compound I ( $\beta$ -D-glucopyranose1-[(E)-3-(4-hydroxyphenyl)-2-propenoat]) .

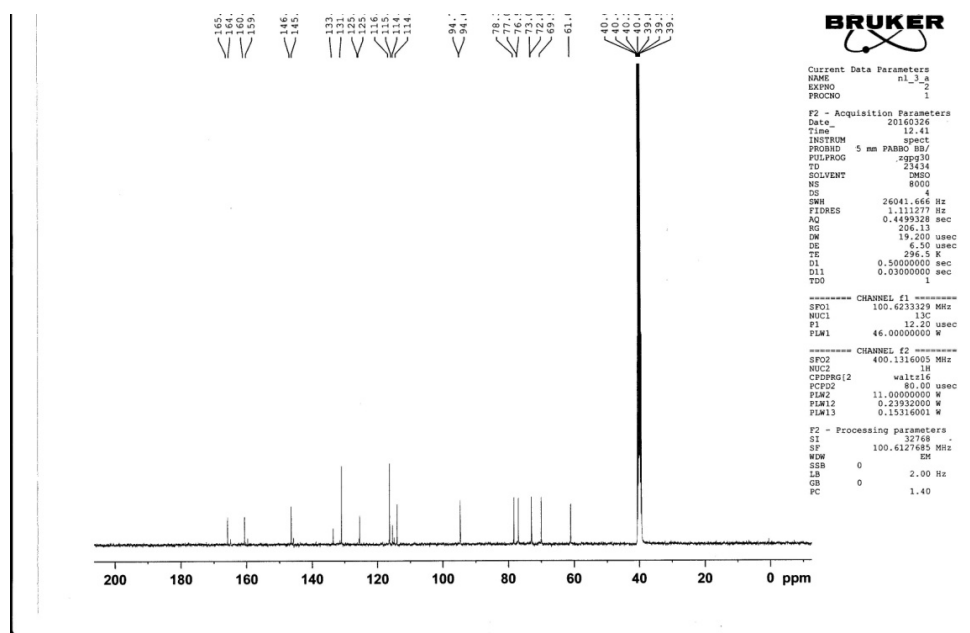

Figure S3.  $^{13}\text{C}$  NMR of compound I ( $\beta$ -D-glucopyranose1-[(E)-3-(4-hydroxyphenyl)-2-propenoat]) .

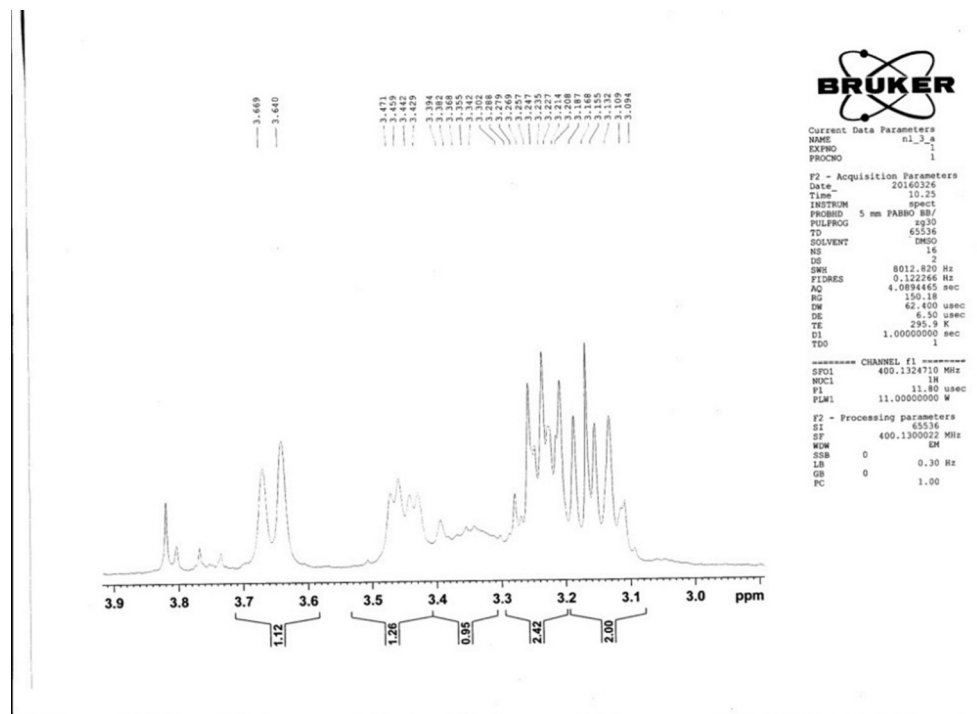

**Figure S4.**  $^1\text{H}$  NMR of compound II ( $\beta$ -D-glucopyranose 1-[(E)-3-(3, 4-dihydroxyphenyl)-2-propenoat]) .

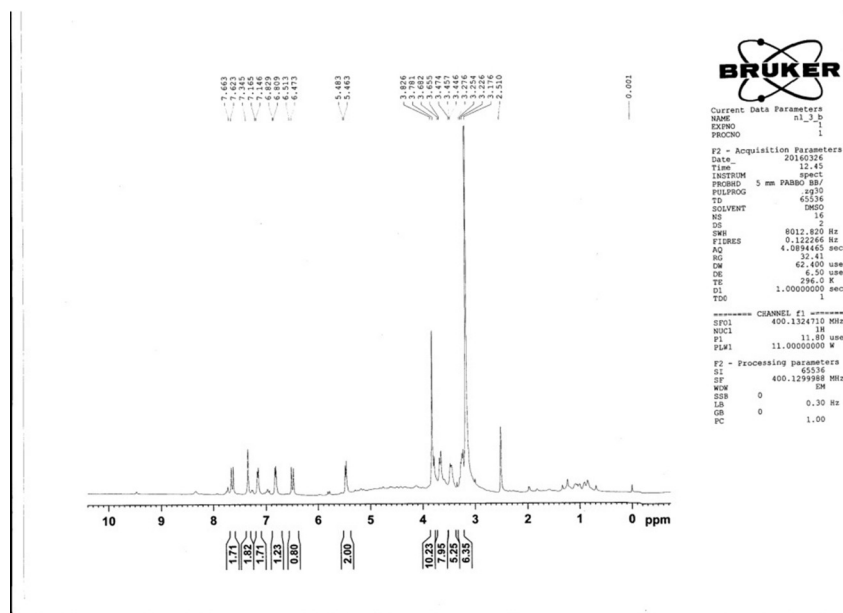

**Figure S5.**  $^1\text{H}$  NMR of compound II ( $\beta$ -D-glucopyranose 1-[(E)-3-(3, 4-dihydroxyphenyl)-2-propenoat]) .

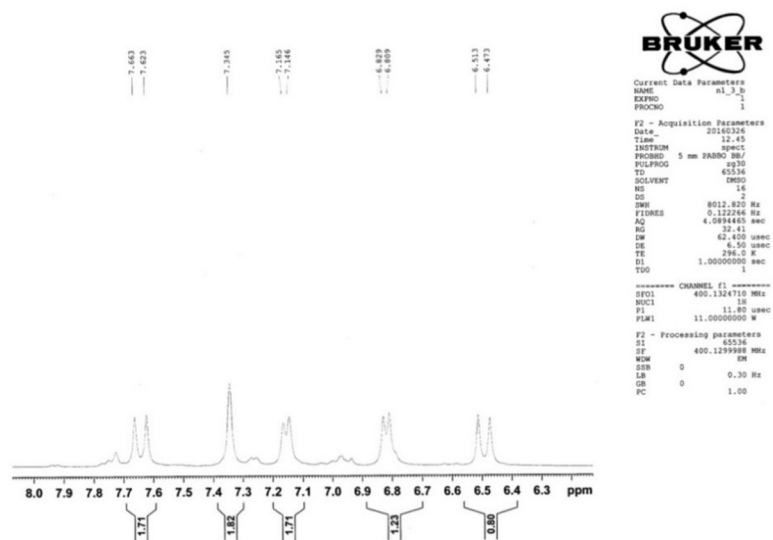

**Figure S6.**  $^1\text{H}$  NMR of compound II ( $\beta$ -D-glucopyranose 1-[(E)-3-(3, 4-dihydroxyphenyl)-2-propenoat]) .

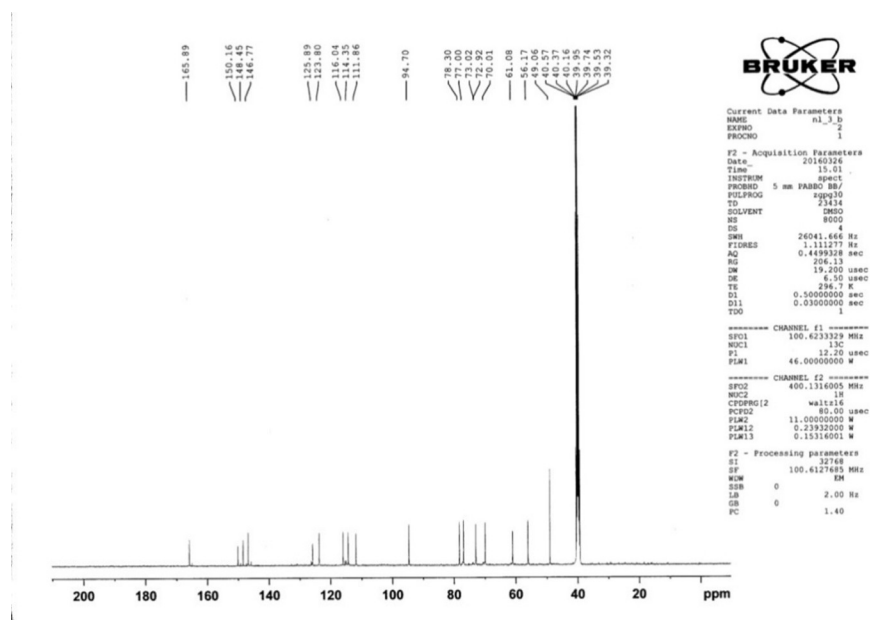

**Figure S7.**  $^{13}\text{C}$  NMR of compound II ( $\beta$ -D-glucopyranose 1-[(E)-3-(3, 4-dihydroxyphenyl)-2-propenoat]) .

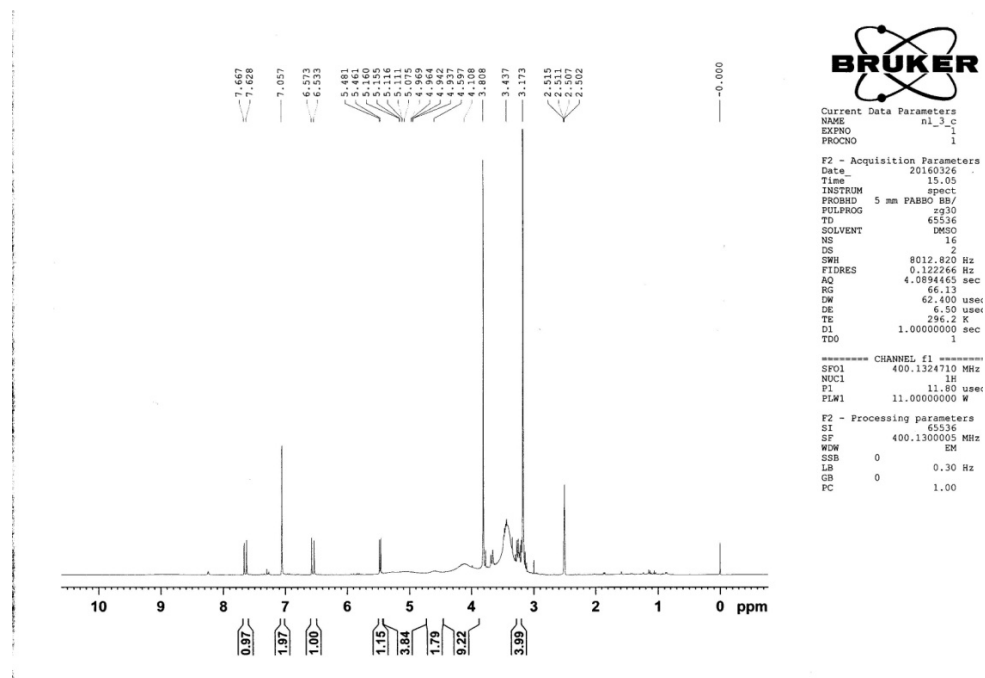

Figure S8.  $^{13}\text{H}$  NMR of compound III (1-O-sinapoyl glucopyranoside) .

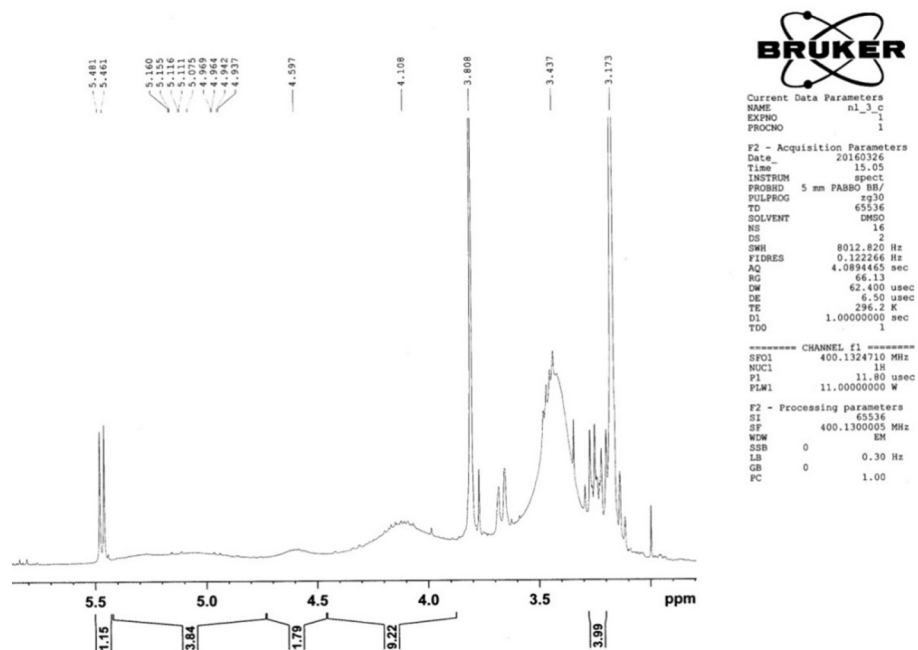

Figure S9.  $^{13}\text{H}$  NMR of compound III (1-O-sinapoyl glucopyranoside) .

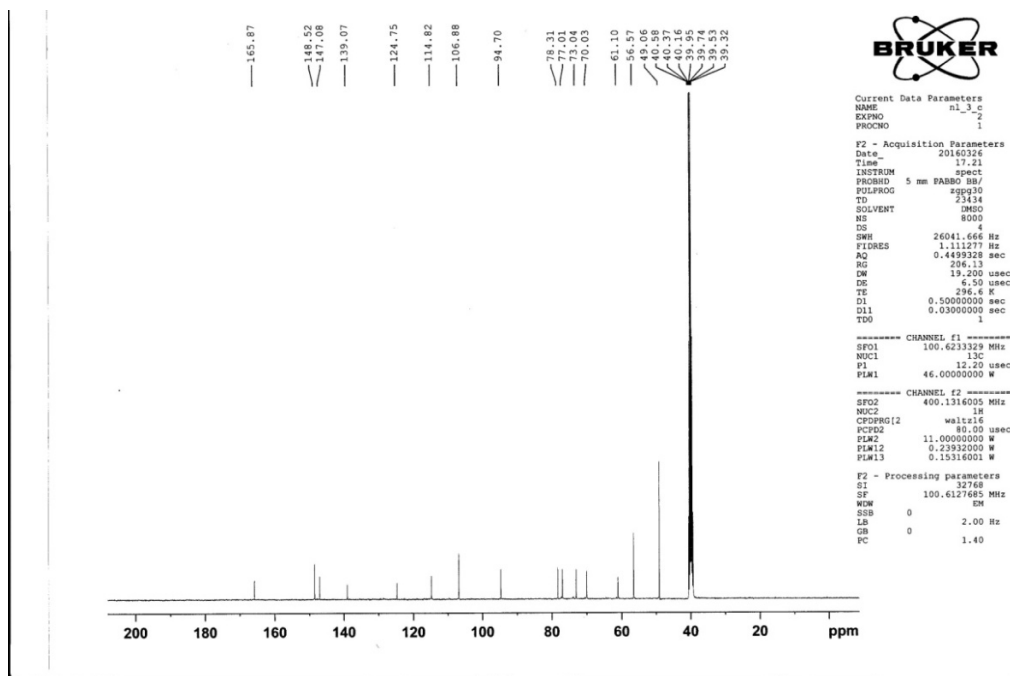

Figure S10.  $^{13}\text{C}$  NMR of compound III (1-O-sinapoyl glucopyranoside) .
